# Supplementary material for: Consequences of maternal mortality on infant and child survival: a 25-year longitudinal analysis in Butajira Ethiopia (1987-2011)
Source: PubMed Central journal article supplement (PMC4423767; doi:10.1186/1742-4755-12-s1-s4), 2015-05-06
Supplement: 1742-4755-12-S1-S4-S2.pdf [file 1742-4755-12-S1-S4-S2.pdf]

**Supplementary Table 2: Cause of death among deceased children in the Butajira cohort (excludes children with missing value for cause of death), 1987-2011**

| <b>Cause</b>                | <b>n</b> |
|-----------------------------|----------|
| Stillbirth                  | 122      |
| Diarrhea/vomiting           | 103      |
| Sudden death                | 61       |
| Pneumonia                   | 61       |
| Malaria                     | 54       |
| Malnutrition                | 54       |
| Accident                    | 27       |
| Tuberculosis                | 21       |
| Premature birth             | 14       |
| Whooping cough              | 14       |
| Hepatitis                   | 9        |
| Pregnancy/ delivery related | 5        |
| Measles                     | 2        |
| Meningitis                  | 1        |
| AIDS                        | 1        |
| Other                       | 310      |
