# Supplementary material for: Consequences of maternal mortality on infant and child survival: a 25-year longitudinal analysis in Butajira Ethiopia (1987-2011)
Source: PubMed Central journal article supplement (PMC4423767; doi:10.1186/1742-4755-12-s1-s4), 2015-05-06
Supplement: 1742-4755-12-S1-S4-S5.pdf [file 1742-4755-12-S1-S4-S5.pdf]

**Supplementary Table 5: Probability of survival to day x for index children by maternal mortality status, expanded definition for late maternal death in Butajira cohort, 1987-2011**

| Days since birth | Maternal death |        | Mother survived |        |
|------------------|----------------|--------|-----------------|--------|
|                  | Survival prob. | n died | Survival prob.  | n died |
| 0                | 0.8333         | 10     | 0.9848          | 274    |
| 30               | 0.6667         | 10     | 0.9759          | 159    |
| 183              | 0.4667         | 12     | 0.9641          | 212    |
| 365              | 0.3833         | 5      | 0.9564          | 137    |
| 1825             | 0.3667         | 1      | 0.9284          | 462    |
| 3652             | 0.3667         | 0      | 0.9173          | 152    |
